# Supplementary material for: Transient species of esculetin produced in pulse radiolysis: experimental and quantum chemical investigations
Source: Royal Society of Chemistry journal article supplement (doi:10.1039/d0cp03130e), 2020-01-01
Supplement: d0cp03130e1.pdf [file d0cp03130e1.pdf]

## Supporting information

Manuscript ID: CP-ART-06-2020-003130

### Transient species of esculetin produced in pulse radiolysis: experimental and quantum chemical investigations

**Rupali G. Deokar<sup>a,b,§</sup>, Atanu Barik<sup>b,c,\*</sup>**

<sup>a</sup>Department of Chemistry, Savitribai Phule Pune University, Pune 411007, India

<sup>b</sup>Radiation and Photochemistry Division, Bhabha Atomic Research Centre, Mumbai 400085,  
India

<sup>c</sup>Homi Bhabha National Institute, Anushaktinagar, Mumbai 400094, India

<sup>§</sup>Present address: Notre Dame Radiation Laboratory, University of Notre Dame, Notre Dame,  
IN, 46556, USA

Corresponding author's email: [atanu@barc.gov.in](mailto:atanu@barc.gov.in)

---

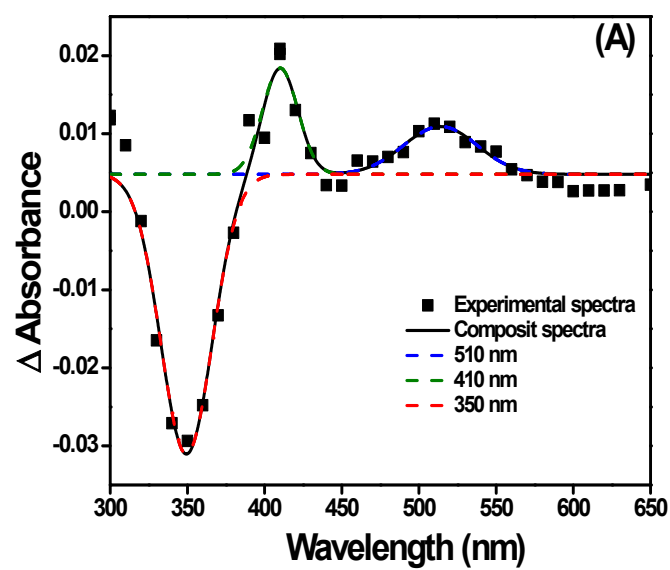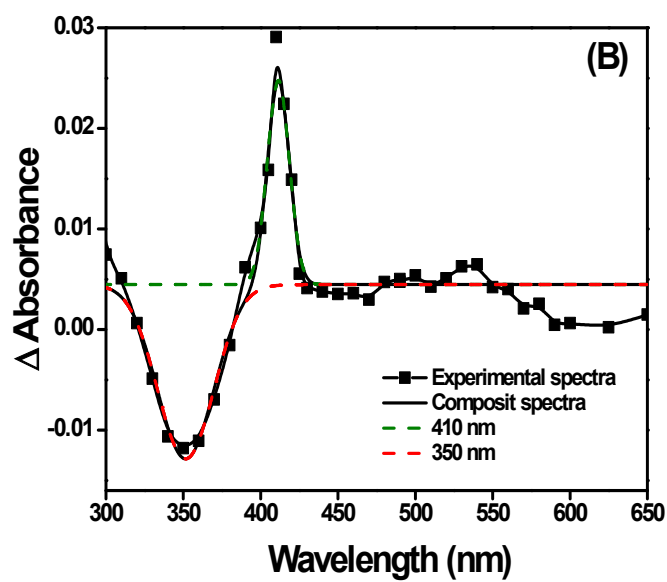

**Figure S1** Deconvolution of the transient spectra obtained during the reaction of *E* with  $\bullet\text{OH}$  radical (A) and with  $\text{N}_3\bullet$  radical (B) after 20  $\mu\text{s}$  of pulse.

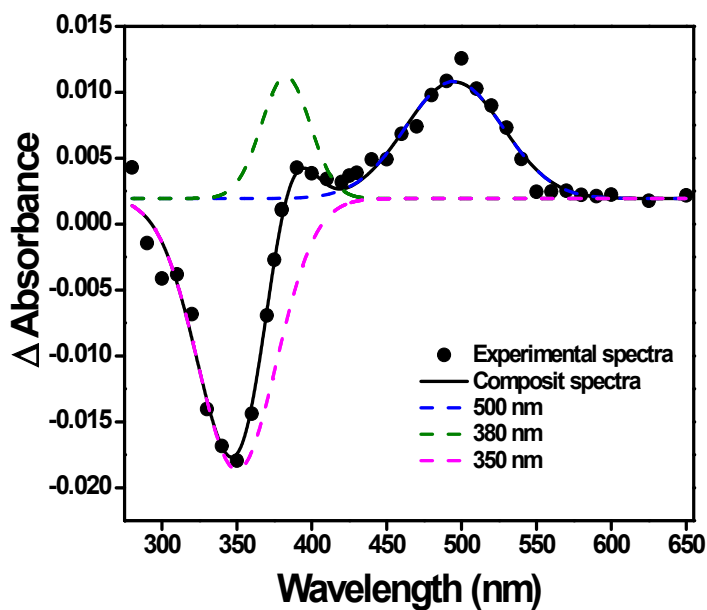

**Figure S2.** Deconvolution of the transient spectra obtained during the reaction of *E* with  $H^\bullet$  atom after 20  $\mu s$  of pulse.

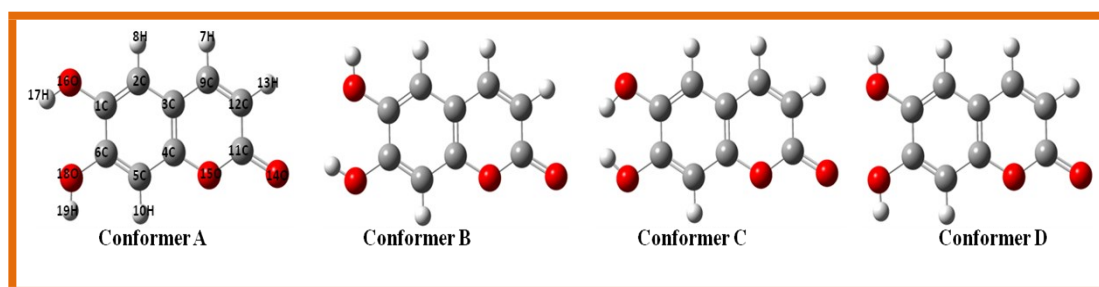

**Figure S3** Possible ground state conformers of *E* used for energy optimization.

**Table ST1.** Energy calculation of the conformers of *E* using B3LYP/6-311++G(d,p) basis set in water phase.

| Conformer | $E_0$ (Hartree) | $\Delta E_0$ (kcal/mol) |
|-----------|-----------------|-------------------------|
| A         | -647.2222       | 0.00                    |
| B         | -647.2219       | #0.21                   |
| C         | -647.2211       | #0.67                   |
| D         | -647.2195       | #1.68                   |

#  $\Delta E_0$  was calculated with respect to the conformer A

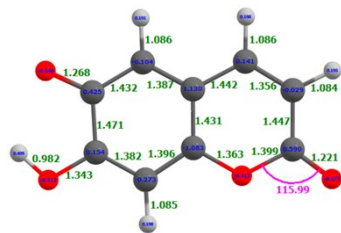

E1•

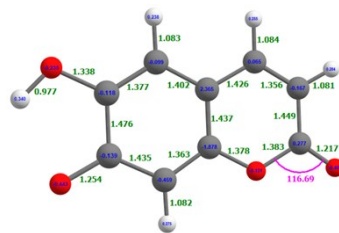

E2•

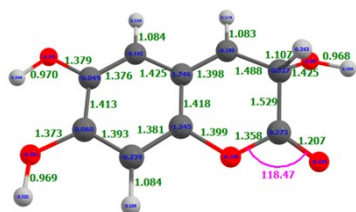

E3•

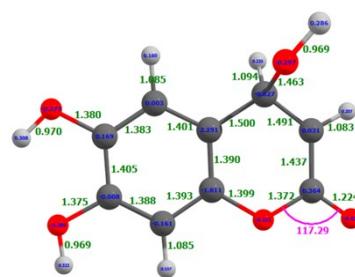

E4•

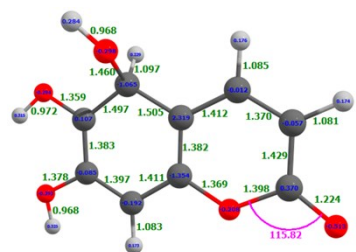

E5•

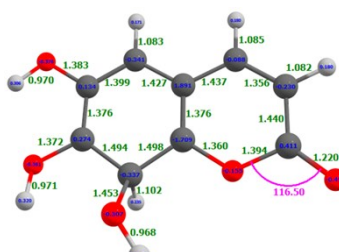

E6•

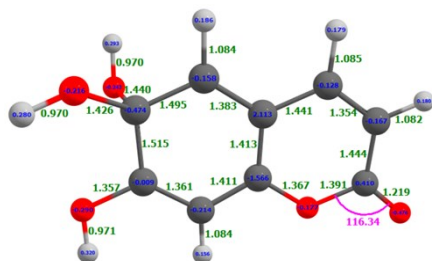

E7•

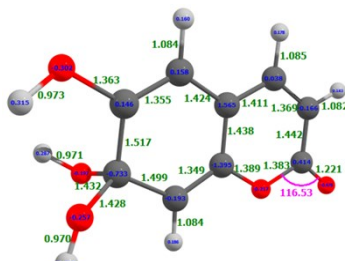

E8•

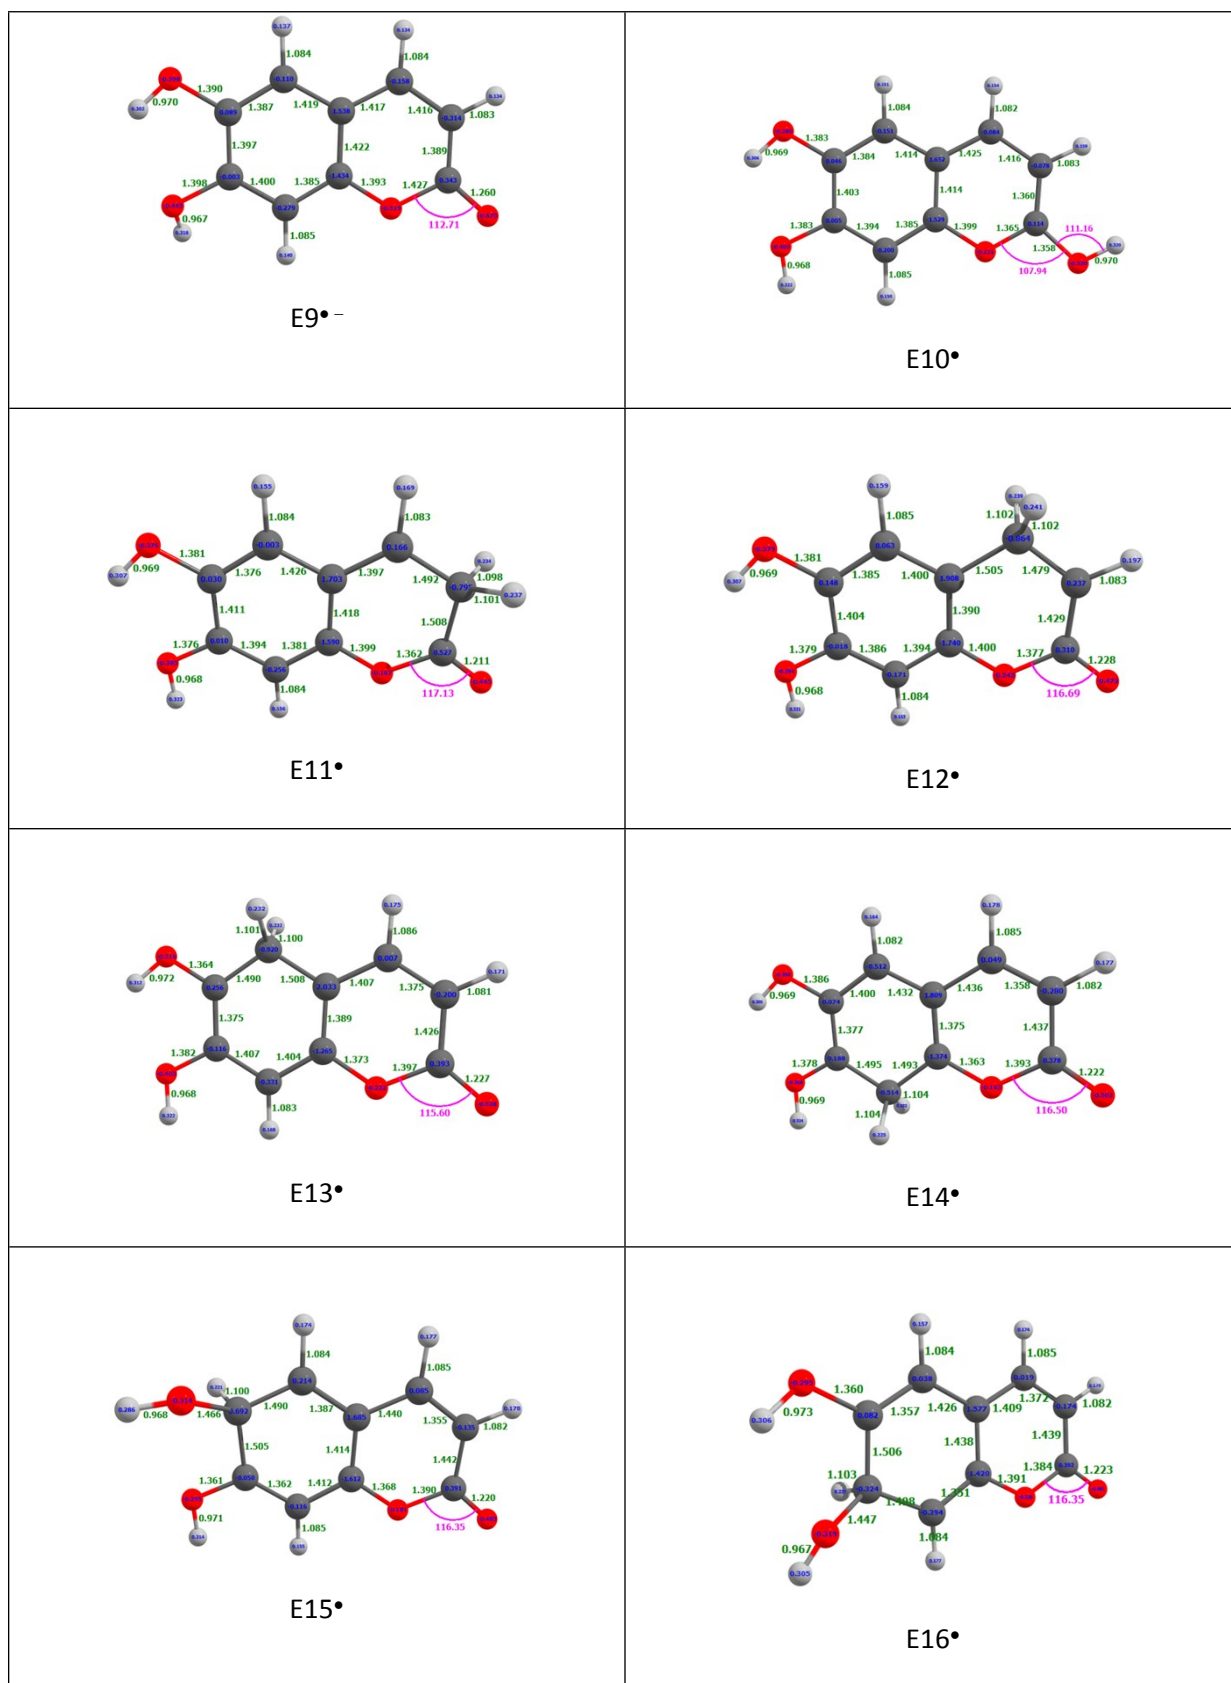

Figure S4. Optimized structures of different transients of E with atomic charges, bond length and bond angles.
